# Supplementary material for: Astrocytic GABA transporter activity modulates excitatory neurotransmission
Source: PubMed Central journal article supplement (PMC5133667; doi:10.1038/ncomms13572), 2016-11-25
Supplement: ncomms13572-s1.pdf [file ncomms13572-s1.pdf]

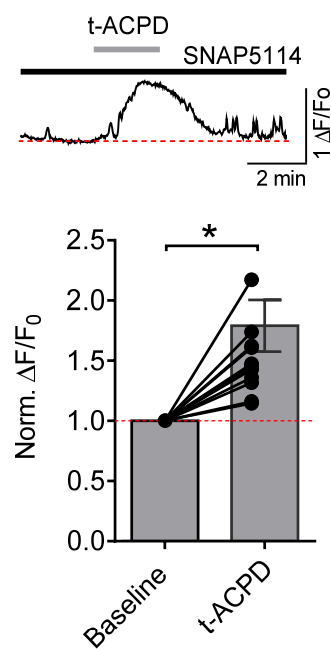

**Supplementary Figure 1.** Activation of metabotropic glutamate receptors induces Ca<sup>2+</sup> increase in the presence of GAT-3 inhibitor. *Top:* representative trace showing change in astrocytic Ca<sup>2+</sup> level following application of t-ACPD (50 μM) in the presence of SNAP5114. *Bottom:* Summary graph (n = 14 cells/2 animals); individual recordings represented by dots, means displayed by bars, error bars represent SEMs; \* p = 0.003 (paired t-test compared to baseline).

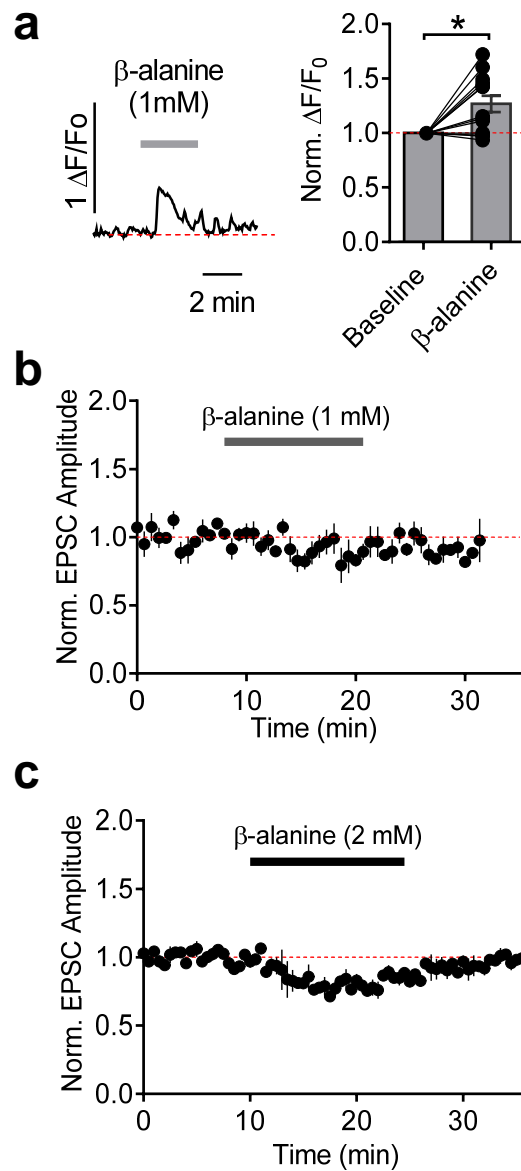

**Supplementary Figure 2.**  $\beta$ -alanine action on astrocytic  $\text{Ca}^{2+}$  responses and EPSCs. **(a)**  $\beta$ -alanine (1 mM) induces  $\text{Ca}^{2+}$  response in astrocytes ( $n = 13$  cells/2 animals). Note that  $\text{Ca}^{2+}$  increase is smaller than that induced by  $30 \mu\text{M}$  GABA (c.f. Fig. 4e). **(b)** Normalized EPSC amplitudes in response to application of 1 mM  $\beta$ -alanine ( $n = 6$  cells/2 animals). **(c)** Normalized EPSC amplitudes in response to application of 2 mM  $\beta$ -alanine ( $n = 3$  cells/2 animals). Error bars represent SEMs, \*  $p = 0.004$  (paired t-test compared to baseline).

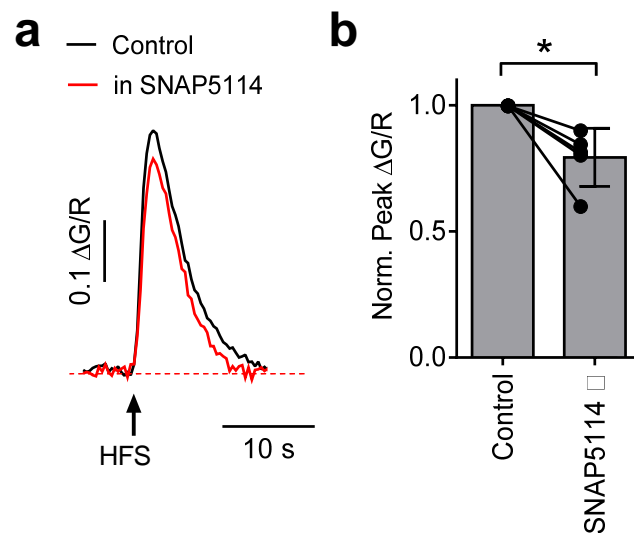

**Supplementary Figure 3.** Astrocytic  $Ca^{2+}$  responses to a one second, 100 Hz tetanus are reduced in the presence of the GAT-3 inhibitor SNAP5114 (100  $\mu M$ ). **(a)** Mean  $Ca^{2+}$  indicator fluorescence response ( $n = 5$  cells/5 animals) to 100 Hz Schaffer collateral stimulation in control conditions (*black*) and in SNAP5114 (*red*). **(b)** Peak  $Ca^{2+}$  response amplitude for individual recordings (*dots*) and mean of five cells (*bars*). Error bars represent SEMs; \*  $p = 0.016$  (paired t-test).
